# Supplementary material for: Teaching the Rorschach Comprehensive System
Source: Atypon-hosted journal article supplement (doi:10.1027/1192-5604/a000138), 2021-03-01
Supplement: 1192-5604_a000138_esm1.pdf [file 1192-5604_a000138_esm1.pdf]

**Table 1**

*The 36-Item Questionnaire (English and French Original Version) with the Percentages of Responses of the Quantitative Sample (n = 64)*

|                                                 |                                                                                                                                                                                                                                                                              | Yes  | No   |
|-------------------------------------------------|------------------------------------------------------------------------------------------------------------------------------------------------------------------------------------------------------------------------------------------------------------------------------|------|------|
|                                                 |                                                                                                                                                                                                                                                                              | %    | %    |
| <i>1. The administration process in general</i> |                                                                                                                                                                                                                                                                              |      |      |
| 2*                                              | I was able to write everything down correctly.<br><i>J'ai su prendre tout en note correctement.</i>                                                                                                                                                                          | 79.7 | 20.3 |
| 25.                                             | I found this exercise difficult from a technical point of view.<br><i>J'ai trouvé cet exercice difficile sous l'angle technique.</i>                                                                                                                                         | 74.6 | 25.4 |
| 5.                                              | I needed to refer to my documents (handouts, forms ...) during the administration.<br><i>J'ai eu besoin de me référer à mes documents lors de la passation.</i>                                                                                                              | 32.8 | 67.2 |
| 32*.                                            | I think my protocol was valid and workable.<br><i>Je pense que mon protocole est valide, exploitable.</i>                                                                                                                                                                    | 73.4 | 26.6 |
| 15.                                             | I made some mistakes during the administration.<br><i>J'ai fait des erreurs lors de la passation.</i>                                                                                                                                                                        | 40.6 | 59.4 |
| 20.                                             | I had trouble regulating the participant's verbal flow.<br><i>J'ai eu du mal à réguler le débit verbal du sujet.</i>                                                                                                                                                         | 37.5 | 62.5 |
| 31*.                                            | Overall, I think I managed this situation quite well.<br><i>Globalement, j'estime avoir bien géré cette situation.</i>                                                                                                                                                       | 92.2 | 7.8  |
| 3*.                                             | I had adequately prepared myself for this exercise.<br><i>Je m'étais suffisamment préparé.e à cet exercice.</i>                                                                                                                                                              | 81.3 | 18.7 |
| 24.                                             | I think that, as a result of my questions or attitude, I unintentionally elicited things in the responses or during the inquiry.<br><i>Je pense que j'ai parfois, du fait de mes questions ou de mon attitude, induit des choses dans les réponses ou lors de l'enquête.</i> | 28.1 | 71.9 |
| <i>Response phase</i>                           |                                                                                                                                                                                                                                                                              |      |      |

|                                              |                                                                                                                                                                        |      |      |
|----------------------------------------------|------------------------------------------------------------------------------------------------------------------------------------------------------------------------|------|------|
| 1*.                                          | I managed to give the instruction correctly.<br><i>J'ai su correctement donner la consigne.</i>                                                                        | 98.4 | 1.6  |
| 26*.                                         | I had a good command of the technical aspects of the administration (test phase).<br><i>J'ai maîtrisé les aspects techniques de la passation (phase de test).</i>      | 95.3 | 4.7  |
| 6.                                           | I had a difficult experience separating the answers.<br><i>J'ai eu du mal à séparer les réponses.</i>                                                                  | 40.6 | 59.4 |
| <hr/> <i>Inquiry phase</i> <hr/>             |                                                                                                                                                                        |      |      |
| 16*.                                         | I had a good command of the technical aspects of the administration (inquiry phase).<br><i>J'ai maîtrisé les aspects techniques de la passation (phase d'enquête).</i> | 54.7 | 45.3 |
| 4.                                           | I made some mistakes during the inquiry phase.<br><i>J'ai fait des erreurs lors de l'enquête.</i>                                                                      | 70.3 | 29.7 |
| 14.                                          | I asked too many questions during the inquiry phase.<br><i>J'ai posé trop de questions à l'enquête.</i>                                                                | 11.1 | 88.9 |
| 19.                                          | I didn't ask enough questions during the inquiry phase.<br><i>Je n'ai pas posé assez de questions à l'enquête.</i>                                                     | 67.2 | 32.8 |
| 17.                                          | I mis-phrased my questions during the inquiry phase.<br><i>J'ai mal formulé mes questions à l'enquête.</i>                                                             | 42.2 | 57.8 |
| <hr/> <i>2. Interpersonal dynamics</i> <hr/> |                                                                                                                                                                        |      |      |
| 11*.                                         | I was able to put the participant at ease.<br><i>J'ai pu mettre le sujet à l'aise.</i>                                                                                 | 92.2 | 7.8  |
| 30*.                                         | I managed to remain at the right distance.<br><i>J'ai su être à la bonne distance.</i>                                                                                 | 93.8 | 6.2  |
| 11.                                          | I felt too close to the participant.<br><i>Je me suis senti.e trop proche du sujet.</i>                                                                                | 26.6 | 73.4 |
| 7.                                           | I felt too distant from the participant.<br><i>Je me suis senti.e trop distant.e du sujet.</i>                                                                         | 7.8  | 92.2 |

|      |                                                                                                                                      |      |      |
|------|--------------------------------------------------------------------------------------------------------------------------------------|------|------|
| 21*. | I managed to set the framework.<br><i>J'ai su poser le cadre.</i>                                                                    | 98.4 | 1.6  |
| 23*. | I managed to maintain the framework.<br><i>J'ai su maintenir le cadre.</i>                                                           | 90.6 | 9.4  |
| 12.  | I found this exercise difficult from a relational standpoint.<br><i>J'ai trouvé cet exercice difficile sous l'angle relationnel.</i> | 35.9 | 64.1 |

---

3. Emotional experience

---

|      |                                                                                                                                                              |      |      |
|------|--------------------------------------------------------------------------------------------------------------------------------------------------------------|------|------|
| 10*. | I felt comfortable.<br><i>Je me suis senti.e à l'aise.</i>                                                                                                   | 89.1 | 10.9 |
| 8.   | I was tense.<br><i>J'étais tendu.e.</i>                                                                                                                      | 50   | 50   |
| 28*. | I found the exercise enjoyable.<br><i>J'ai trouvé cet exercice agréable.</i>                                                                                 | 92.2 | 7.8  |
| 36*. | I empathised with the participant.<br><i>Je me suis senti.e en empathie avec le sujet.</i>                                                                   | 92.2 | 7.8  |
| 9.   | I was at times anxious during the exercise.<br><i>J'ai parfois été anxieux durant cet exercice.</i>                                                          | 60.9 | 39.1 |
| 35.  | Some of the participant's responses made me ill-at-ease or uncomfortable.<br><i>Certaines réponses du sujet ont déclenché chez moi une gêne, un malaise.</i> | 20.3 | 79.7 |
| 18.  | Some of the participants's answers made feel like laughing.<br><i>Certaines réponses du sujet m'ont donné envie de rire.</i>                                 | 40.6 | 59.4 |

---

4. Professional stance

---

|      |                                                                                                                                     |      |     |
|------|-------------------------------------------------------------------------------------------------------------------------------------|------|-----|
| 29*. | I feel I am capable of improving my command of this tool.<br><i>Je me sens capable de progresser dans la maîtrise de cet outil.</i> | 100  | 0   |
| 13*. | I want to continue administering Rorschach tests.<br><i>J'ai envie de continuer à faire passer des Rorschach.</i>                   | 95.3 | 4.7 |

|      |                                                                                                                                         |      |      |
|------|-----------------------------------------------------------------------------------------------------------------------------------------|------|------|
| 34*. | I think I'll use this test for my master's dissertation.<br><i>Je pense que j'utiliserai ce test pour mon mémoire.</i>                  | 68.3 | 31.7 |
| 22*. | I think I will use this test in my professional practice.<br><i>Je pense que j'utiliserai ce test dans ma pratique professionnelle.</i> | 92.2 | 7.8  |
| 8*.  | The Rorschach test is a tool I'm interested in.<br><i>Le test de Rorschach est un outil qui m'intéresse.</i>                            | 98.4 | 1.6  |

---

Note. \* reversed item
