# Supplementary material for: Teaching the Rorschach Comprehensive System
Source: Atypon-hosted journal article supplement (doi:10.1027/1192-5604/a000138), 2021-03-01
Supplement: 1192-5604_a000138_esm2.pdf [file 1192-5604_a000138_esm2.pdf]

**Table 2**

*Theoretical Test Knowledge, Coding Mastery and Administration Process Self-Evaluation*

| Items                     | Global performance |          | Scoring performance |          |
|---------------------------|--------------------|----------|---------------------|----------|
|                           | <i>Rho</i>         | <i>p</i> | <i>Rho</i>          | <i>p</i> |
| I felt comfortable        | .33                | .031*    | .40                 | .011*    |
| Techn. mastery (inquiry)  | .15                | ns       | .36                 | .023*    |
| Embarrassment, discomfort | -.32               | .04*     | .06                 | ns       |

*Note.*  $\rho$  = Pearson's correlation coefficient,  $p$  = probability
