# Supplementary material for: Teaching the Rorschach Comprehensive System
Source: Atypon-hosted journal article supplement (doi:10.1027/1192-5604/a000138), 2021-03-01
Supplement: 1192-5604_a000138_esm3.pdf [file 1192-5604_a000138_esm3.pdf]

**Table 3**

*Description of the Forms - Class 1 and  $\chi^2$  of Association*

| Forms        | $\chi^2$ | Forms          | $\chi^2$ | Forms        | $\chi^2$ |
|--------------|----------|----------------|----------|--------------|----------|
| Test         | 661.95*  | Interview      | 30.58*   | Rich         | 16.93*   |
| Rorschach    | 517.34*  | Theoretical    | 30.18*   | Anxious      | 15.56*   |
| To run       | 320.01*  | Complexity     | 30.18*   | Concrete     | 15.56*   |
| Run test     | 285.84*  | Clinic         | 24.72*   | To prepare   | 15.41*   |
| Experience   | 150.45*  | Administration | 22.73*   | Stress       | 14.96**  |
| To learn     | 95.72*   | WISC           | 22.43*   | Department   | 13.78**  |
| Practice     | 86.71*   | Feedback       | 21.43*   | Pleased      | 13.78**  |
| Projective   | 82.34*   | Material       | 21.42*   | To meet      | 13.55**  |
| To know      | 65.43*   | Fundamental    | 21.4*    | Informative  | 13.45**  |
| To proceed   | 61.1*    | Progress       | 21.23*   | To involve   | 12.97**  |
| Tool         | 56.94*   | To imagine     | 19.23*   | Entertaining | 12.8**   |
| Exercise     | 56.01*   | Positive       | 18.85*   | Beneficial   | 12.8**   |
| Apprehension | 50.44*   | Easy           | 18.31*   | Preparation  | 12.43**  |
| Knowledge    | 48.78*   | Use            | 17.94*   | Necessity    | 12.23**  |
| Training     | 48.1*    | Skill          | 17.94*   | Result       | 11.72**  |
| To conduct   | 47.18*   | To intimidate  | 17.94*   | Enthusiasm   | 11.72**  |
| To acquire   | 47.06*   | To appropriate | 17.94*   | To respect   | 11.76**  |
| Internship   | 43.51*   | To work        | 17.71*   | To study     | 11.08**  |
| Interesting  | 39.89*   | Enriching      | 17.6*    | To master    | 10.84**  |
| Learning     | 35.92*   | Theory         | 17.31*   | Work         | 10.81**  |
| To apprehend | 31.73*   | Distrustful    | 17.06*   | Challenge    | 10.52**  |
| Contact      | 31.37*   | Efficiency     | 17.06*   |              |          |

Note. \* $p < 0.0001$       \*\* $p < 0.001$

**Table 4**

*Description of the Forms - Class 2 and  $\chi^2$  of Association*

| Forms               | $\chi^2$ | Forms        | $\chi^2$ | Forms        | $\chi^2$ |
|---------------------|----------|--------------|----------|--------------|----------|
| Plate               | 511.83*  | Protocol     | 32.87*   | To disturb   | 15.71*   |
| To give             | 320.24*  | To encourage | 32.22*   | To remove    | 15.36*   |
| Response            | 284.98*  | To answer    | 30.8*    | Pleasure     | 14.73**  |
| Number              | 88.18*   | Short        | 30.25*   | Enough       | 12.85**  |
| Silence             | 37.45*   | To force     | 30.19*   | Defensive    | 12.39**  |
| To turn             | 64.35*   | Thought      | 25.94*   | To operate   | 12.24**  |
| To turn upside down | 52.2*    | Fuzzy        | 25.88*   | To be afraid | 12.1**   |
| VIII                | 43.43*   | To worry     | 20.99*   | Sexual       | 11.82**  |
| Interpretation      | 42.92*   | To block out | 20.67*   | Coloured     | 11.82**  |
| First               | 38.54*   | To stop      | 19.39*   | Willingness  | 11.7**   |
| Ordinary            | 37.73*   | To interfere | 18.85*   | Description  | 11.3**   |
| Valid               | 37.32*   | Production   | 17.69*   | To refuse    | 10.2**   |
| I                   | 33.88*   | Laugh        | 16.82*   | Original     | 10.2**   |
| To provide          | 33.55*   | Comment      | 16.51*   |              |          |

Note. \* $p < 0.0001$       \*\* $p < 0.001$

**Table 5**

*Description of the Forms - Class 3 and  $\chi^2$  of Association*

| Forms        | $\chi^2$ | Forms           | $\chi^2$ | Forms        | $\chi^2$ |
|--------------|----------|-----------------|----------|--------------|----------|
| Relationship | 231.67*  | Personal        | 34.03*   | Old          | 16.99*   |
| Psychologist | 223.86*  | Reassuring      | 32.22*   | Intrusion    | 16.99*   |
| Role         | 156.27*  | Confidence      | 32.22*   | To dominate  | 16.99*   |
| Attitude     | 151.01*  | Professional    | 30.62*   | Atmosphere   | 16.85*   |
| Position     | 147.03*  | To maintain     | 26.76*   | To allow     | 16.85*   |
| Neutrality   | 140.78*  | Friendly        | 29.76*   | Practitioner | 16.08*   |
| Benevolent   | 119.9*   | Reaction        | 28.88*   | Available    | 14.4**   |
| Trust        | 118.94*  | To open         | 28.5*    | Discomfort   | 13.94**  |
| Comfort      | 91.89*   | Ambiance        | 28.5*    | Psychic      | 13.24**  |
| To establish | 73.33*   | Functioning     | 28.5*    | To conflict  | 12.74**  |
| Situation    | 72.35*   | To share        | 28.3*    | To invade    | 12.74**  |
| To put       | 70.02*   | To enter        | 28.15*   | Intern       | 12.74**  |
| To initiate  | 69.02*   | Judgement       | 24.4*    | Weight       | 12.74**  |
| To keep      | 68.22*   | Negative        | 24.33*   | Mutual       | 12.74**  |
| Examiner     | 66.61*   | Cold            | 24.33*   | Privacy      | 12.74**  |
| Neutral      | 64.84*   | Questioning     | 24.33*   | To cross     | 12.74**  |
| Tester       | 61.36*   | Behaviour       | 24.12*   | Barrier      | 12.74**  |
| To check     | 57.22*   | Nervousness     | 24.12*   | To bias      | 12.7**   |
| Distance     | 57.01*   | Constant        | 21.25*   | Status       | 12.46**  |
| Framework    | 56.03*   | Life            | 21.25*   | Patient      | 12.45**  |
| Serious      | 50.15*   | Reassurance     | 21.25*   | Relaxed      | 12.16**  |
| Affect       | 45.35*   | Door            | 21.25*   | Institution  | 12.04**  |
| To test      | 44.38*   | Emotion         | 20.58*   | To reinforce | 12.04**  |
| To adopt     | 42.71*   | Transferential  | 20.58*   | Setting      | 12.04**  |
| Benevolence  | 41.12*   | Inexperience    | 20.18*   | Clinician    | 12.04**  |
| To play      | 40.41*   | To show through | 20.15*   | To invest    | 12.03**  |
| Environment  | 38.56*   | Student         | 18.87*   | Need         | 11.06**  |
| Learner      | 37.53*   | To sense        | 18.83*   | Validity     | 10.88**  |
| To feel      | 36.01*   | Limit           | 18.66*   | To reassure  | 10.44**  |
| Own          | 35.96*   | Desire          | 18.62*   |              |          |

Note. \* $p < 0.0001$       \*\* $p < 0.001$

**Table 6**

*Description of the Forms - Class 4 and  $X^2$  of Association*

| Forms       | $\chi^2$ | Forms         | $\chi^2$ | Forms         | $\chi^2$ |
|-------------|----------|---------------|----------|---------------|----------|
| Question    | 270.04*  | Precision     | 41.46*   | Influence     | 22.19*   |
| Survey      | 211.1*   | To proofread  | 40.86*   | Localization  | 21.38*   |
| Decisive    | 196.47*  | To explain    | 36.59*   | Movement      | 19.36*   |
| To ask      | 147.32*  | To obtain     | 36.15*   | To detail     | 19.07*   |
| Perception  | 120.73*  | Texture       | 33.13*   | Relief        | 17.29    |
| Form        | 119.59*  | To deepen     | 32.49*   | To degrade    | 17.29*   |
| To relaunch | 99.01*   | Information   | 31.95*   | To rate       | 17.13*   |
| Word        | 91.67*   | To identify   | 31.9*    | To determine  | 16.28*   |
| Example     | 91.07*   | To bring up   | 29.43*   | To resume     | 16.26*   |
| Fading      | 78.25*   | Justification | 28.96*   | Useless       | 16.12*   |
| Rating      | 68.2*    | Adjective     | 26.28*   | Thoroughgoing | 16.12*   |
| Colour      | 61.41*   | Keyword       | 26.28*   | Complete      | 16.02*   |
| Answer      | 55.7*    | To bring      | 25.65*   | Simple        | 15.47*   |
| To insist   | 47.11*   | Conclusive    | 25.43*   | To forget     | 15.26*   |
| Key         | 45.87*   | To specify    | 24.25*   | Necessary     | 14.59*   |
| To justify  | 44.82*   | Appropriate   | 22.74*   | Instruction   | 10.41*   |
| Explanation | 41.94*   | To clarify    | 22.34*   |               |          |
| Shade       | 41.59*   | Proofreading  | 22.24*   |               |          |

Note. \* $p < 0.0001$       \*\* $p < 0.001$

**Table 7**

*Description of the Forms - Class 5 and  $\chi^2$  of Association*

| Forms         | $\chi^2$ | Forms             | $\chi^2$ | Forms         | $\chi^2$ |
|---------------|----------|-------------------|----------|---------------|----------|
| Note          | 513.05*  | Transcript        | 43.31*   | Elocution     | 20.08*   |
| To note down  | 391.37*  | Issue             | 41.27*   | To accelerate | 20.08*   |
| To write      | 297.72*  | To loose          | 39.81*   | Abbreviation  | 20.08*   |
| To jot down   | 263.09*  | Quick             | 37.18*   | To organize   | 19.19*   |
| Block diagram | 175.85*  | Writing           | 36.2*    | Rate          | 18.99*   |
| Sheet         | 153.83*  | To adapt          | 34.78*   | To show       | 18.54*   |
| Rhythm        | 115.91*  | Order             | 30.36*   | Integrity     | 16.06*   |
| Speech        | 96.27*   | Facial expression | 30.28*   | Location      | 16.06*   |
| To slow down  | 88.97*   | Scoring           | 30.24*   | Concentration | 15.13**  |
| To speak      | 87.41*   | Sentence          | 28.88*   | To focus      | 13.23**  |
| Flow rate     | 77.83*   | To localize       | 28.88*   | To manage     | 11.97**  |
| Difficulty    | 77.58*   | To observe        | 27.52*   | Paper         | 11.63**  |
| To transcribe | 73.6*    | Break time        | 26.84*   | Commentary    | 11.47**  |
| Localization  | 72.95*   | Latency           | 26.84*   | Exclamation   | 11.3**   |
| To keep pace  | 72.51*   | Verbatim          | 26.84*   | Speed         | 11.3**   |
| To circle     | 56.85*   | To encounter      | 26.72*   | To juggle     | 11.3**   |
| Slowly        | 50.79*   | Survey            | 25.11*   | Verbal        | 10.51**  |
| Careful       | 50.4*    | Pen               | 24.11*   | To forget     | 10.35**  |
| To watch      | 49.33*   | Discourse         | 23.4*    | Material      | 10.22**  |
| To listen     | 49.29*   | Tense             | 22.9*    | To break in   | 10.13**  |
| Organization  | 48.91*   | Place             | 20.58*   |               |          |
| To repeat     | 45.53*   | Flow              | 20.08*   |               |          |

Note. \* $p < 0.0001$       \*\* $p < 0.001$
